# Supplementary material
Source: PubMed Central journal article supplement (PMC2992270)
Supplement: supp_M110.171637_jbc.M110.171637-8.pdf [file supp_M110.171637_jbc.M110.171637-8.pdf]

## SUPPLEMENTAL DATA

FIGURE S1 **Purification of CGT from tomato seedlings.** SICGT was purified from 14-day-old tomato seedlings using a combination of chromatographic separation steps. Shown is a Coomassie Blue-stained gel containing protein from various stages of the enzyme purification: 1, crude protein, desalted on Sephadex G-25; 2, Q-Sepharose; 3, Phenylsepharose; 4, Superdex G-75; 5, Mono-Q; M, molecular weight standards.

FIGURE S2. **SICGT is encoded by a single-copy gene.** Southern blot analysis of tomato genomic DNA, probed with the full length *SICGT* cDNA. DNA (5 µg) was isolated from tomato seedlings and digested with the restriction enzymes *EcoRI* (1) and *NcoI* (2). Hybridization with the full length cDNA resulted in one and two bands in *EcoRI*- and *NcoI*-digested DNA, respectively. As a restriction site for *NcoI* is located in the cDNA sequence of *SICGT*, the two visible bands derive from a single gene.

FIGURE S3. **The isolated cDNA encodes an active CGT.** Traces of HPLC analyses of CGT assays run with protein extracts of *Nicotiana benthamiana* leaves transformed with *SICGT* cDNA under control of the promoter of the *Rubisco* gene from *Asteraceous chrysanthemum*. Controls were performed using transformations with the empty vector pBINPLUS and revealed no CGT activity.

FIGURE S4. **Specificity of anti-SICGT antibody tested by Western blot analysis.** Protein extract from 7-day-old tomato seedlings and selected fractions from the purification of SICGT (7) were separated by SDS-PAGE and stained with Coomassie blue (A) or transferred to nitrocellulose and immunostained using the anti-SICGT antibody followed by a goat anti-rabbit IgG antibody coupled to alkaline phosphatase (B). Immuno decorated SICGT was visualized by staining with *p*-nitroblue tetrazoline chloride (NBT) and 5-bromo-4-chloro-3-indolylphosphate (BCIP). Note the detection of a single band in all lanes corresponding to the protein fractions from SICGT purification visible in (A). 1, crude plant extract; 2, first purification using DEAE column; 3, purification by FPLC; 4, SICGT eluted from SDS gel; M, molecular weight standards.

FIGURE S5. **Colorimetric analysis of SICGT hydrolytic activity.** A, SICGT activity was evaluated by a colorimetric assay. Lipase activity was estimated colorimetrically by measuring the liberation of *p*-nitrophenol from *p*-nitrophenyl laurate. *Candida rugosa* lipase activity is given as a control. B, Colour change during enzyme assay with the substrate *p*-nitrophenyl laurate. Yellow colour indicates the liberation of *p*-nitrophenol.

TABLE S1. **Summary of PCR primer sequences.**

TABLE S2. **Inhibition of SICGT enzyme activity by the serine inhibitor phenylmethylsulfonylfluoride (PMSF).**
